# Supplementary material for: Surface anion-rich NiS2 hollow microspheres derived from metal–organic frameworks as a robust electrocatalyst for the hydrogen evolution reaction
Source: Royal Society of Chemistry journal article supplement (doi:10.1039/c7ta06671f), 2017-01-01
Supplement: c7ta06671f1.pdf [file c7ta06671f1.pdf]

**Electronic Supplementary Information (ESI) for**

**Surface anion-rich NiS<sub>2</sub> hollow microspheres derived from metal-organic frameworks as a robust electrocatalyst for hydrogen evolution reaction**

Tian Tian,<sup>†</sup> Lan Huang,<sup>†</sup> Lunhong Ai\*, and Jing Jiang\*

Chemical Synthesis and Pollution Control Key Laboratory of Sichuan Province, College of Chemistry and Chemical Engineering, China West Normal University, 1# Shida Road, Nanchong 637002, P.R. China.

E-mail: ah\_aihong@163.com (L. Ai), 0826zjjh@163.com (J. Jiang); Tel/Fax: +86-817-2568081

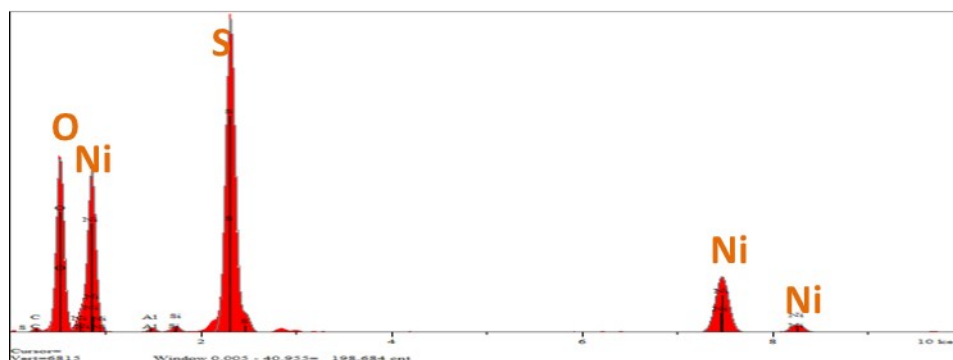

**Fig. S1** EDS spectrum of NiS<sub>2</sub> HMSs

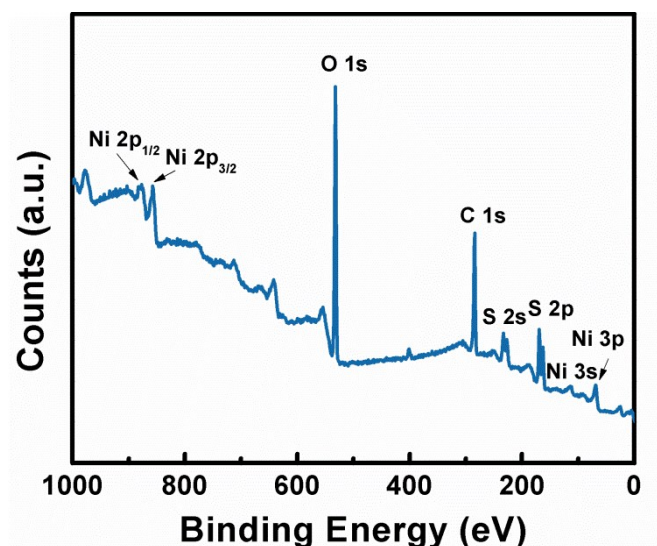

**Fig. S2** Survey XPS spectrum of NiS<sub>2</sub> HMSs

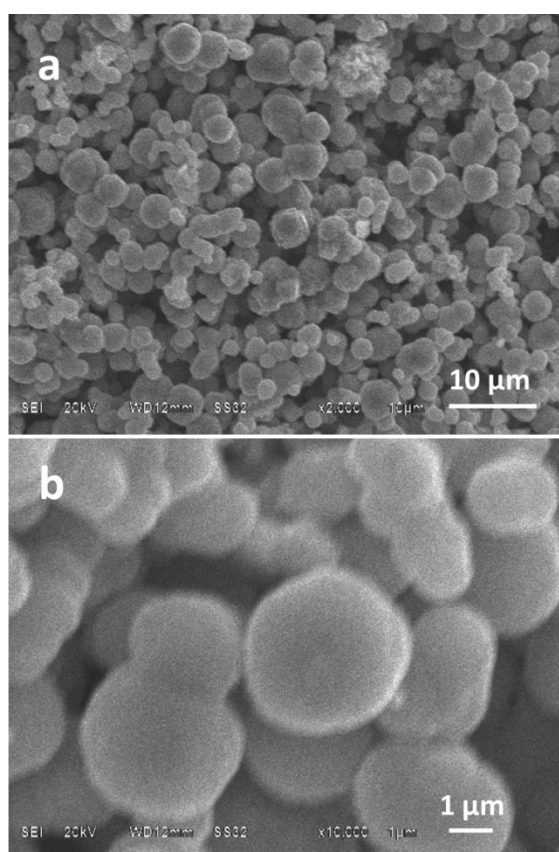

**Fig. S3** SEM images of the HT-NiS<sub>2</sub> HMSs

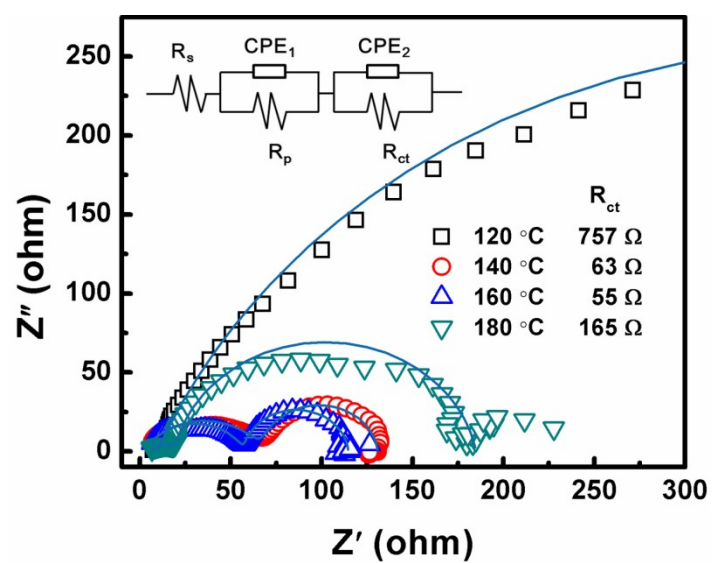

**Fig. S4** EIS Nyquist plots of the NiS<sub>2</sub> products obtained at different irradiation temperatures for electrocatalytic HER at a potential of -1.3 V.
